# Supplementary material for: One step synthesis of a bimetallic (Ni and Co) metal–organic framework for the efficient electrocatalytic oxidation of water and hydrazine
Source: Royal Society of Chemistry journal article supplement (doi:10.1039/d2nj00773h), 2022-01-01
Supplement: d2nj00773h1.pdf [file d2nj00773h1.pdf]

*Electronic Supplementary Information (ESI)*

**One Step Synthesis of Bimetallic (Ni and Co) Metal-Organic Framework for the  
Efficient Electrocatalytic Oxidation of Water and Hydrazine†**

*Smita Singh,<sup>a</sup> Mamta Yadav,<sup>a</sup> Devesh Kumar Singh,<sup>a</sup> Dharmendra Kumar Yadav,<sup>b</sup> Piyush  
Kumar Sonkar,<sup>c</sup> and Vellaichamy Ganesan\*<sup>a</sup>*

<sup>a</sup>Department of Chemistry, Institute of Science, Banaras Hindu University, Varanasi-221005,  
UP, India

Telephone: +91-542-2307321; Fax: +91-542-2368127

E-mail: [velganes@yadoo.com](mailto:velganes@yadoo.com) and [velgan@bhu.ac.in](mailto:velgan@bhu.ac.in)

<sup>b</sup>Department of Chemistry, University of Delhi, Delhi-110007, India

<sup>c</sup>Department of Chemistry, MMV, Banaras Hindu University, Varanasi, 221005, UP, India

†Electronic supplementary information (ESI) is available as mentioned in the text

\*Corresponding author

**Table S1:** Impedance parameters for the MOF coated GC electrodes

| <b>Material</b> | <b><math>R_s</math> (<math>\Omega</math>)</b> | <b><math>R_{ct}</math> (<math>\Omega</math>)</b> |
|-----------------|-----------------------------------------------|--------------------------------------------------|
| Ni-MOF          | 55.59                                         | 6720                                             |
| Co-MOF          | 81.68                                         | 1593                                             |
| NiCo-MOF (1:1)  | 84.68                                         | 1524                                             |
| NiCo-MOF (1:3)  | 81.89                                         | 2885                                             |
| NiCo-MOF (3:1)  | 64.69                                         | 6552                                             |

**Table S2:** ECSA of the synthesized MOFs in 1.0 M KOH

| <b>MOFs</b>    | <b>ECSA (cm<sup>2</sup>)</b> |
|----------------|------------------------------|
| Ni-MOF         | 12                           |
| Co-MOF         | 100                          |
| NiCo-MOF (1:1) | 105                          |
| NiCo-MOF (1:3) | 49                           |
| NiCo-MOF (3:1) | 14                           |

**Table S3:** Recovery analysis of HZ present in real samples using GC/NiCo-MOF (1:1) electrode.

| <b>Samples</b>                                                                                              | <b>HZ added<br/>(<math>\mu\text{M}</math>)</b> | <b>HZ found<br/>(<math>\mu\text{M}</math>)</b> | <b>Recovery<br/>(%)</b> | <b>RSD<br/>(%)</b> |
|-------------------------------------------------------------------------------------------------------------|------------------------------------------------|------------------------------------------------|-------------------------|--------------------|
| <b>Cigarette (Capstan) extract (40<math>\mu\text{L}</math>)<br/>Detected: 27.8 <math>\mu\text{M}</math></b> | 125                                            | 134                                            | 104                     | 1.4                |
|                                                                                                             | 250                                            | 239                                            | 95.9                    | 1.2                |
|                                                                                                             | 375                                            | 342                                            | 91.4                    | 3.5                |
| <b>Tap water (40<math>\mu\text{L}</math>)<br/>Detected: 0.0 <math>\mu\text{M}</math></b>                    | 125                                            | 114                                            | 91.3                    | 6.4                |
|                                                                                                             | 250                                            | 232                                            | 92.9                    | 7.3                |
|                                                                                                             | 375                                            | 355                                            | 94.7                    | 7.5                |

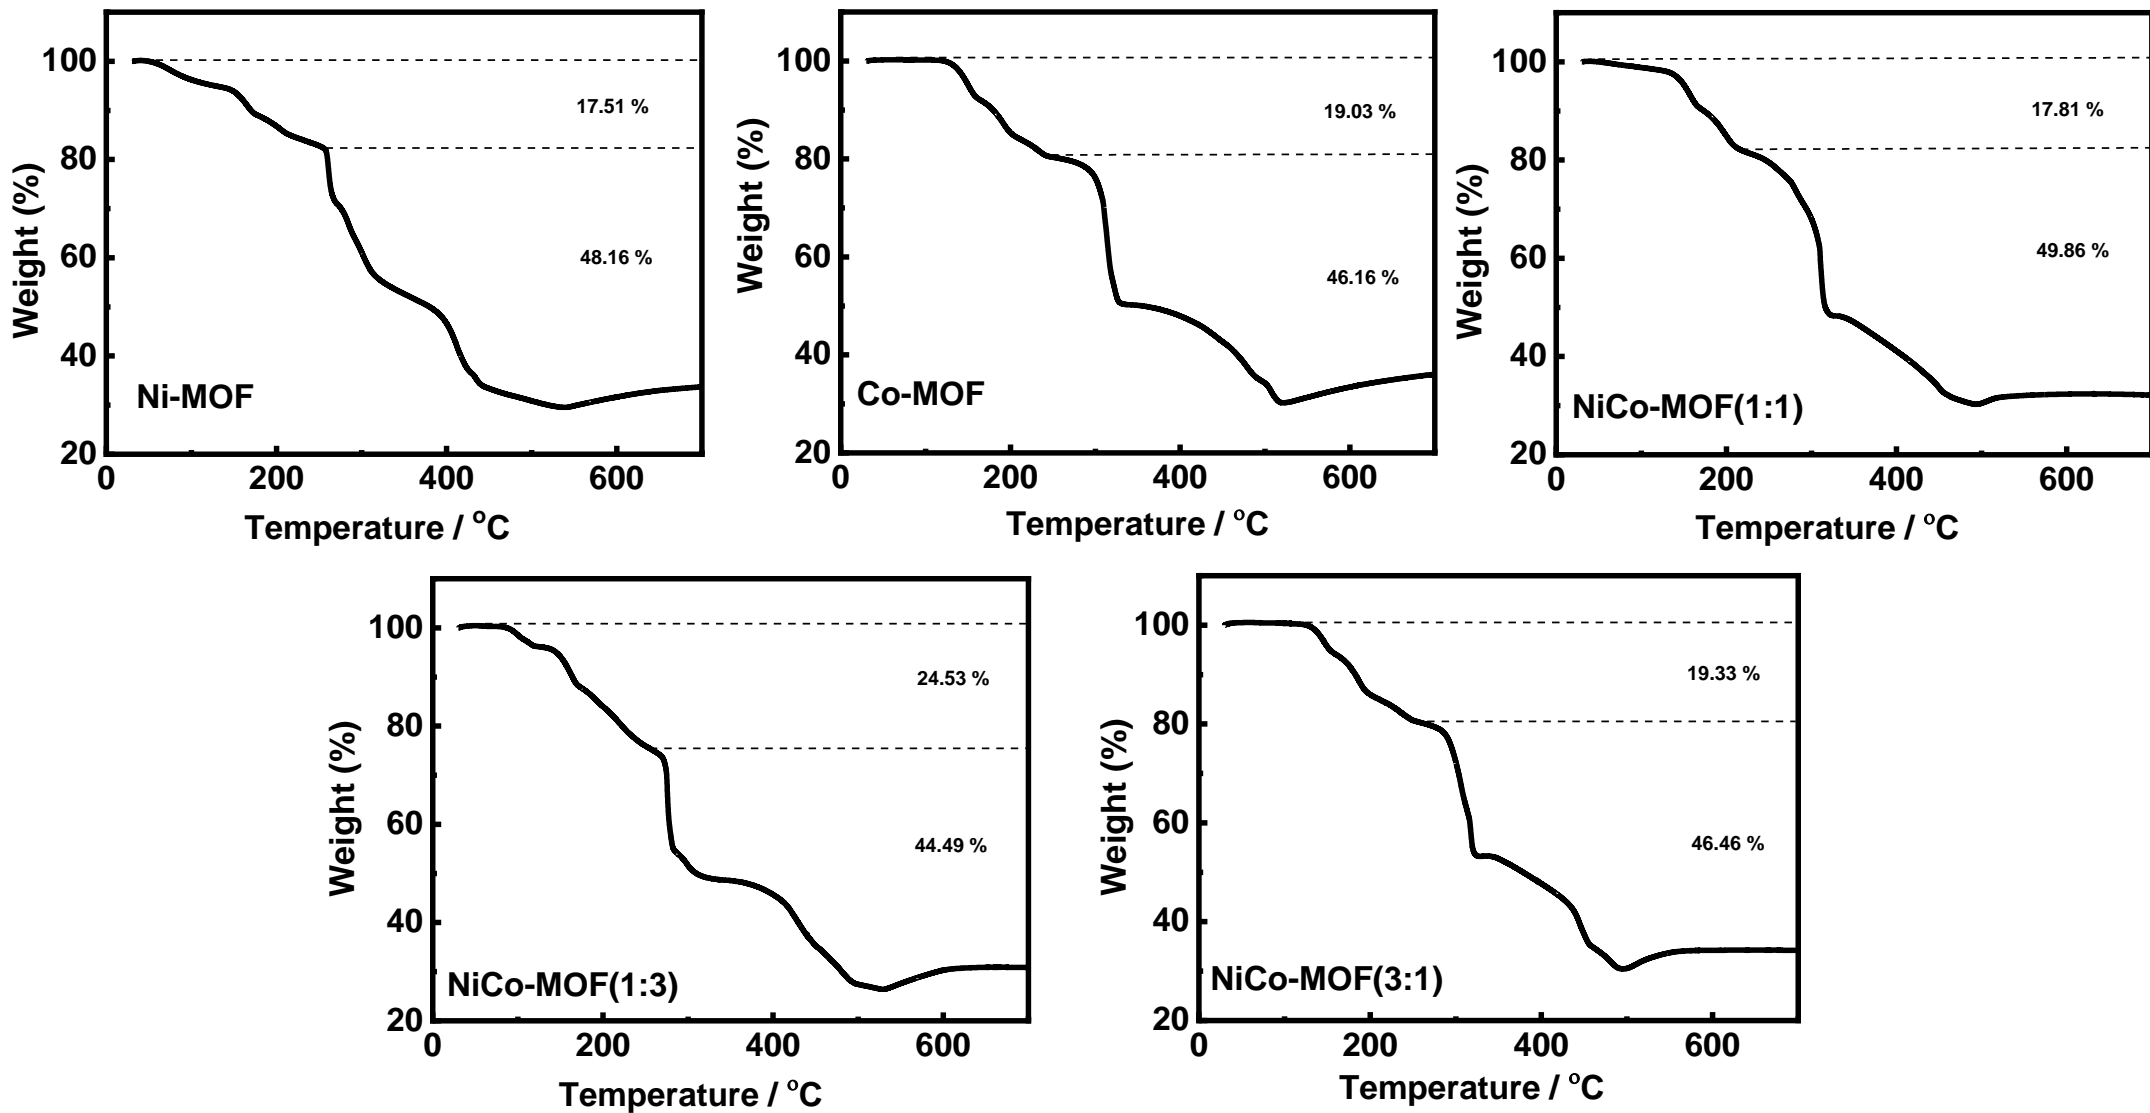

**Fig. S1.** TGA plots of Ni-MOF, Co-MOF, NiCo-MOF (1:1), NiCo-MOF (1:3), and NiCo-MOF (3:1).

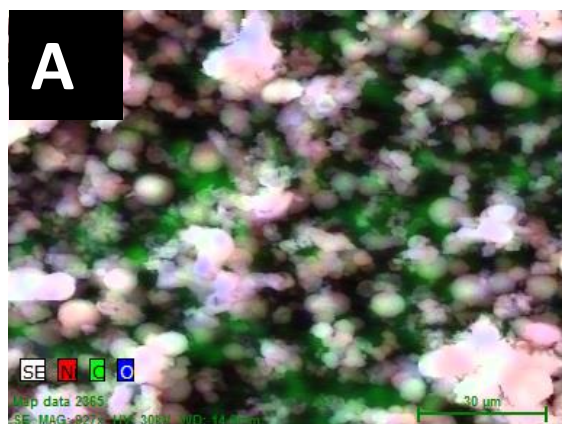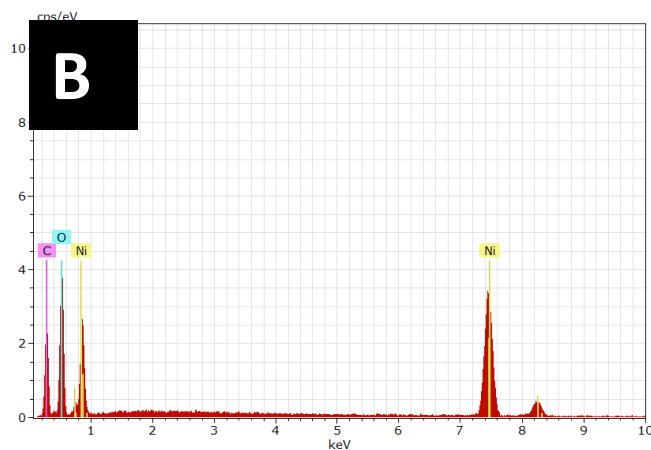

| Element | Atomic % | Weight % |
|---------|----------|----------|
| Carbon  | 47.26    | 34.67    |
| Oxygen  | 47.45    | 46.36    |
| Nickel  | 5.29     | 18.97    |

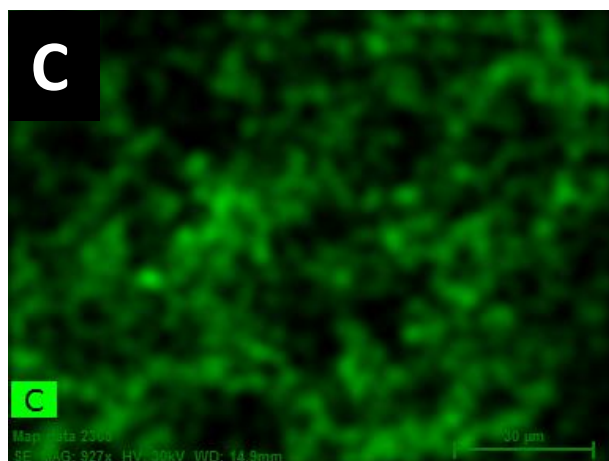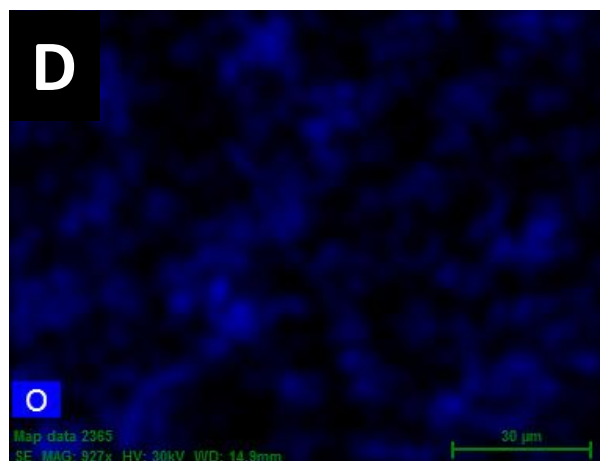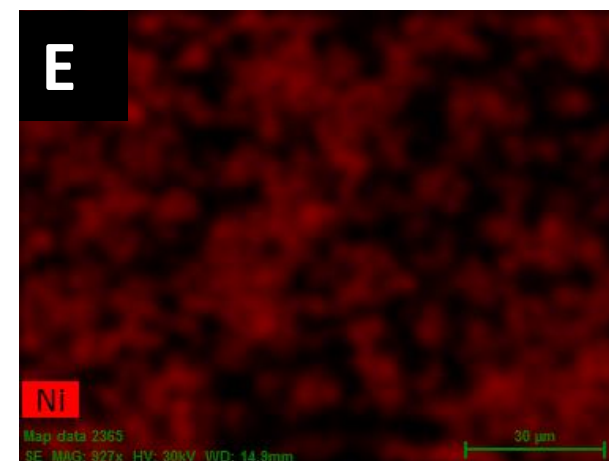

**Fig. S2.** EDAX and mapping of Ni-MOF indicating the presence of expected elements.

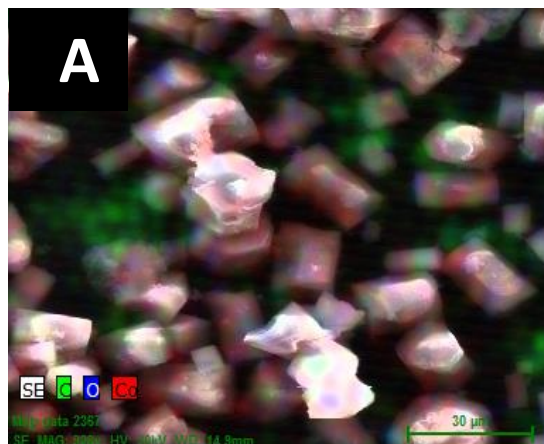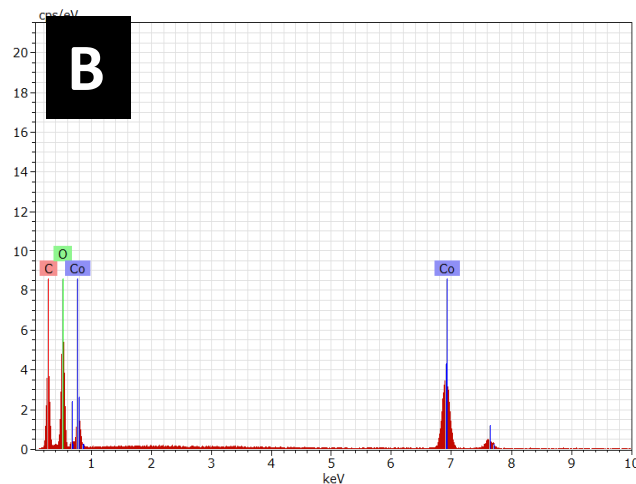

| Element | Atomic % | Weight % |
|---------|----------|----------|
| Carbon  | 47.75    | 36.94    |
| Oxygen  | 48.92    | 50.41    |
| Cobalt  | 3.33     | 12.65    |

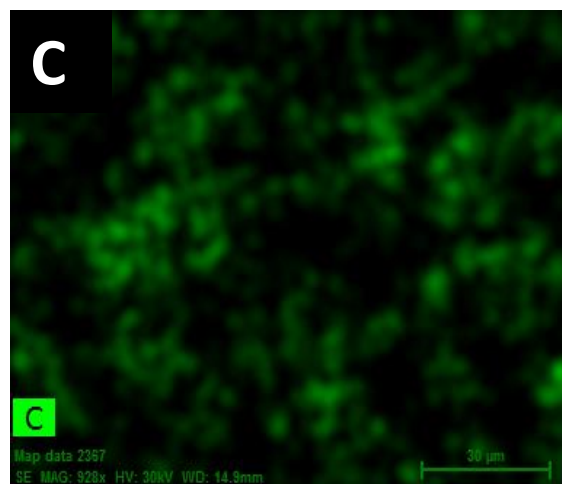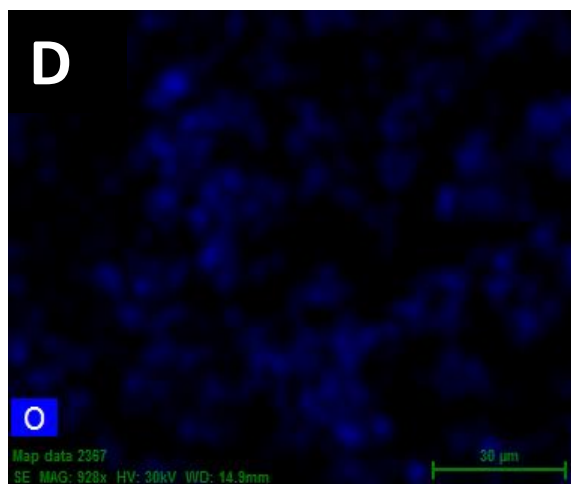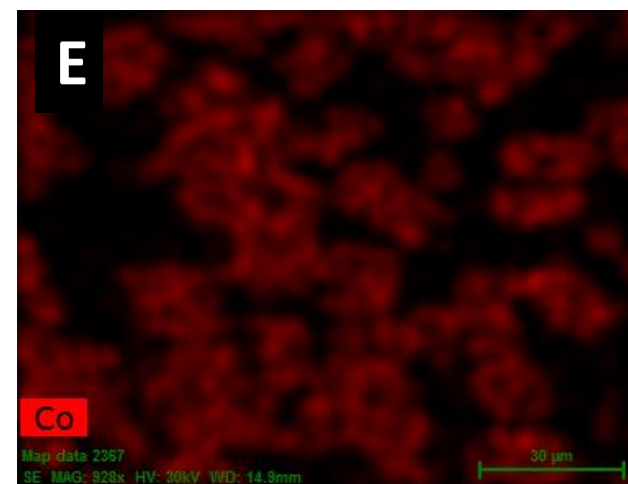

**Fig. S3.** EDAX and mapping of Co-MOF indicating the presence of expected elements.

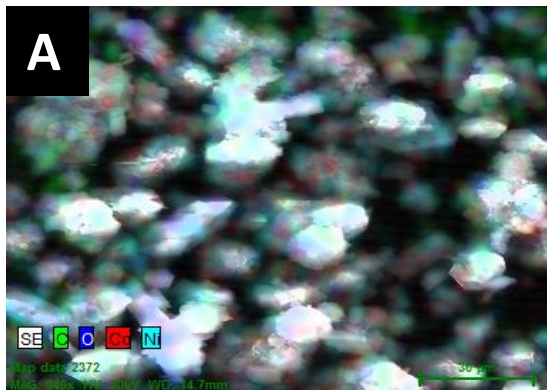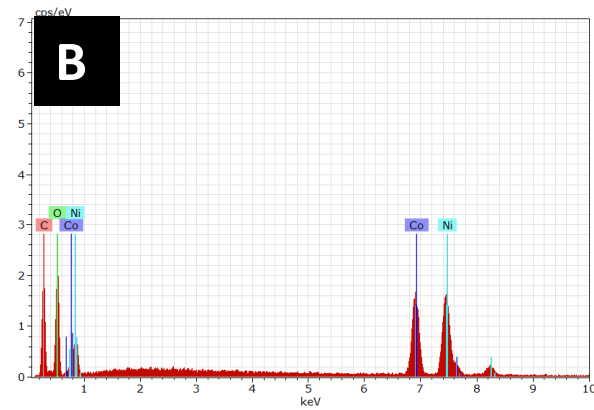

| Element | Atomic % | Weight % |
|---------|----------|----------|
| Carbon  | 53.50    | 38.40    |
| Oxygen  | 39.80    | 38.06    |
| Nickel  | 3.53     | 12.37    |
| Cobalt  | 3.17     | 11.18    |

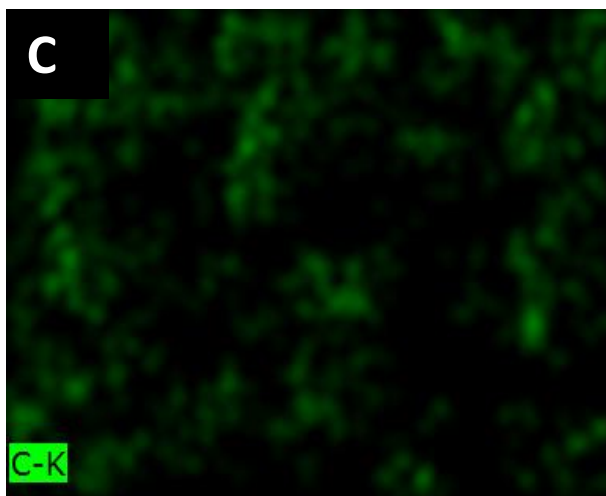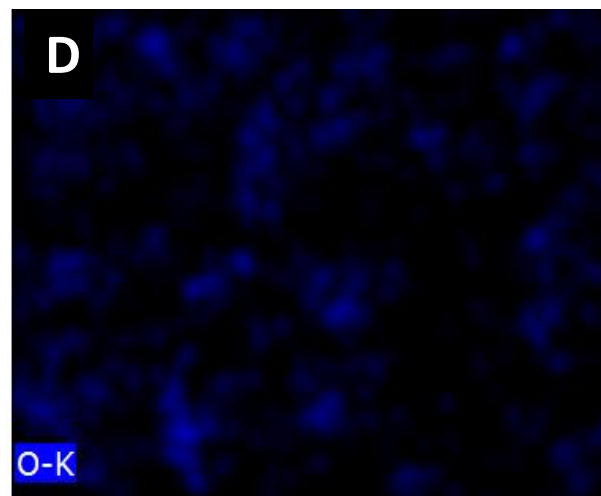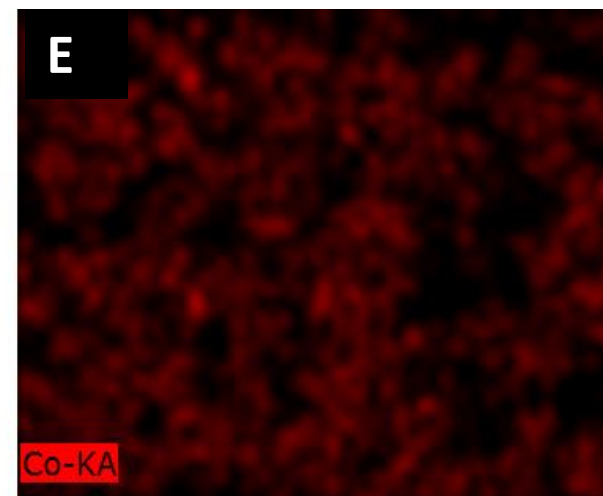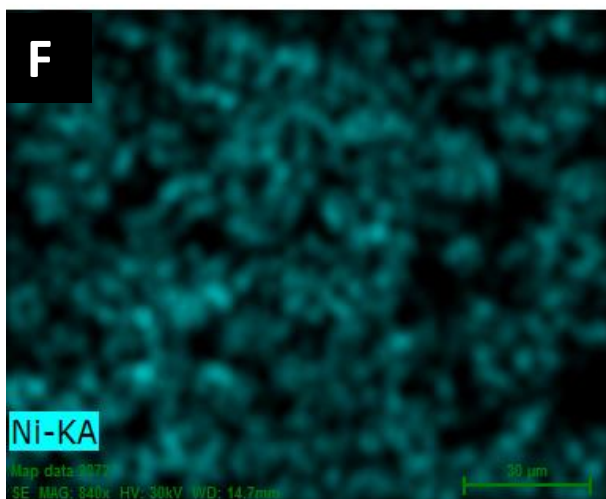

**Fig. S4.** EDAX and mapping of NiCo-MOF (1:1) indicating the presence of expected elements.



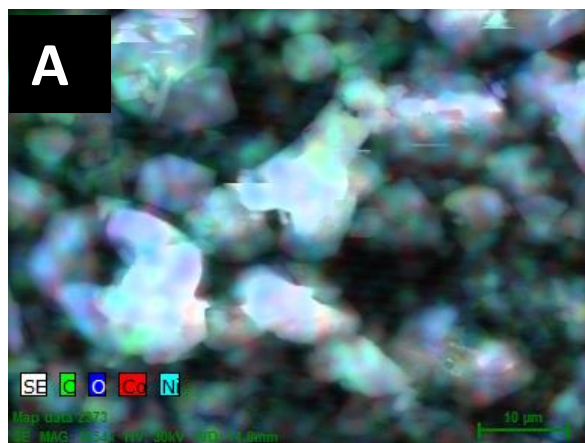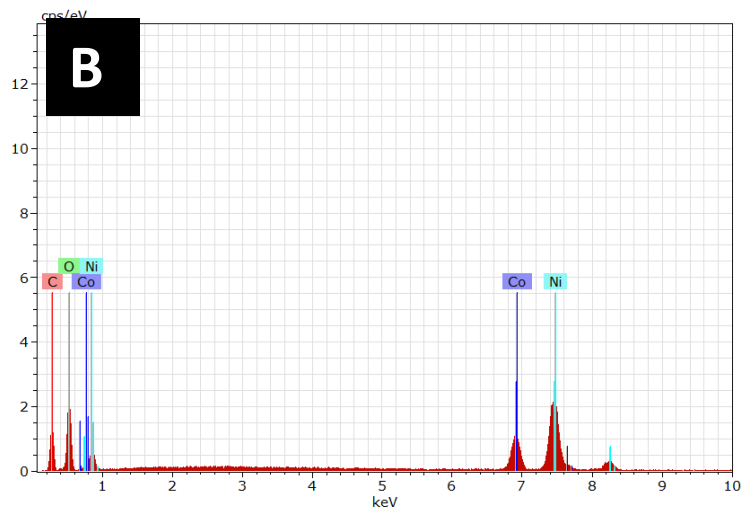

| Element | Atomic % | Weight % |
|---------|----------|----------|
| Carbon  | 48.07    | 32.45    |
| Oxygen  | 43.25    | 38.89    |
| Nickel  | 6.20     | 20.44    |
| Cobalt  | 2.48     | 8.22     |

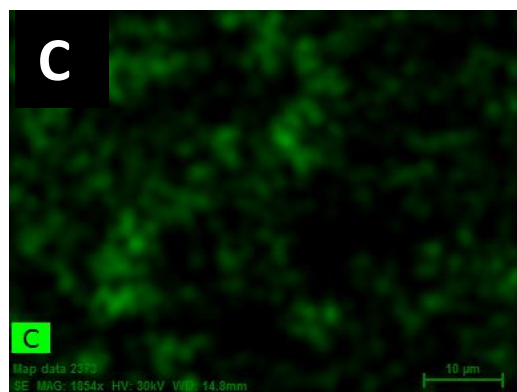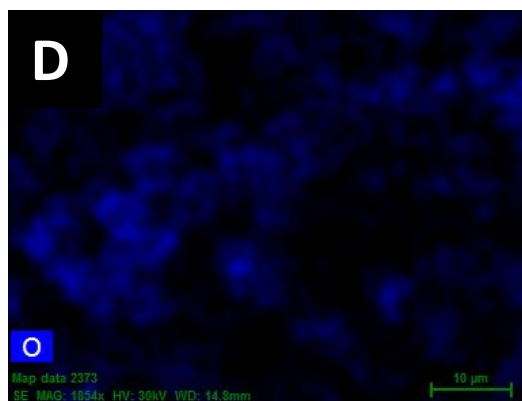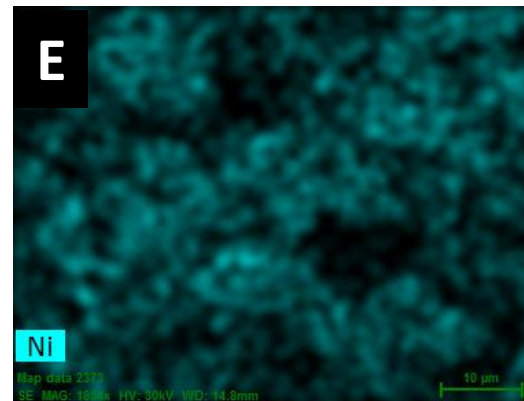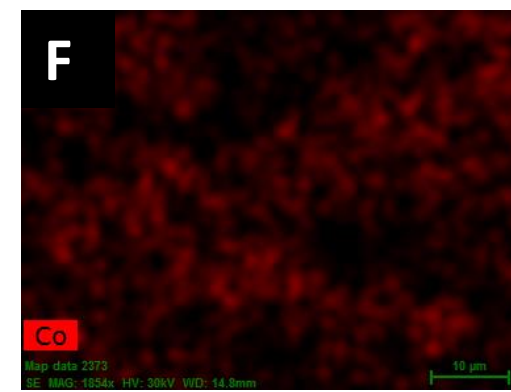

**Fig. S5.** EDAX and mapping of NiCo-MOF (3:1) indicating the presence of expected elements.

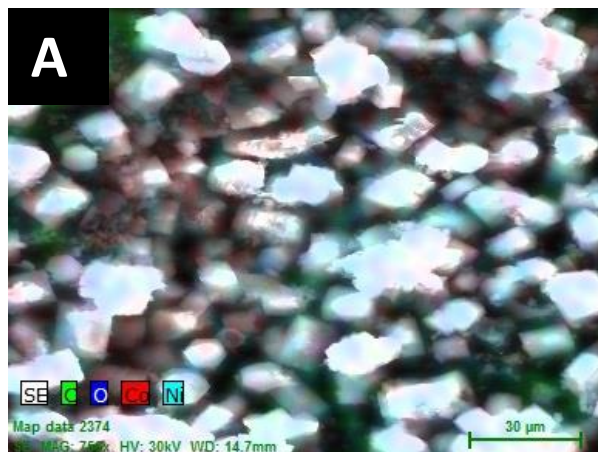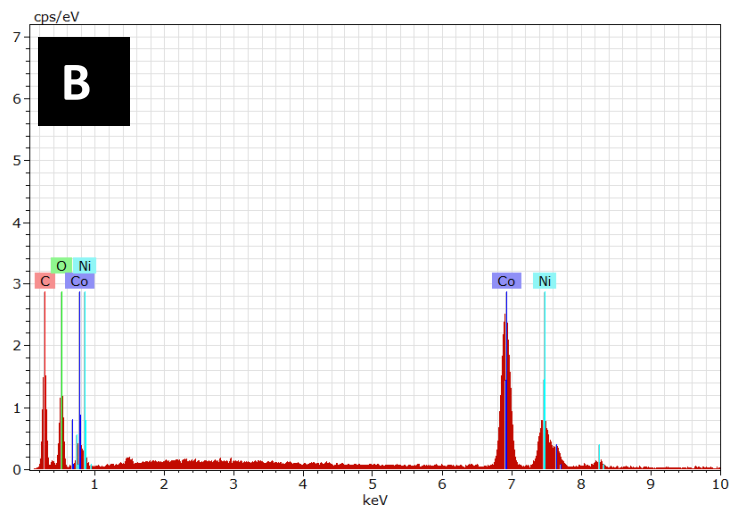

| Element | Atomic % | Weight % |
|---------|----------|----------|
| Carbon  | 58.71    | 40.86    |
| Oxygen  | 32.90    | 30.50    |
| Nickel  | 2.22     | 7.75     |
| Cobalt  | 6.17     | 21.07    |

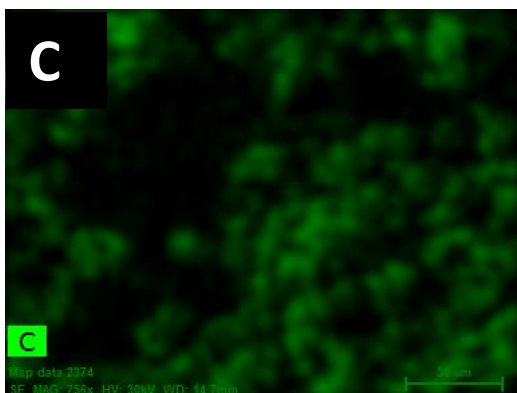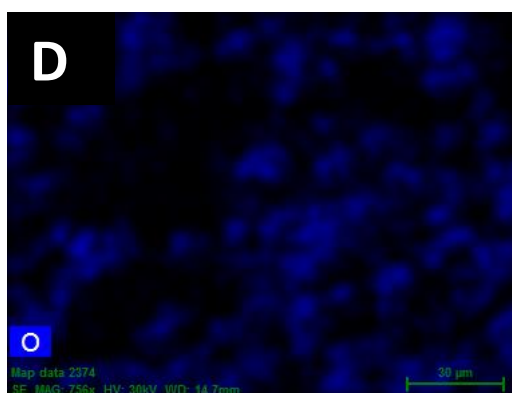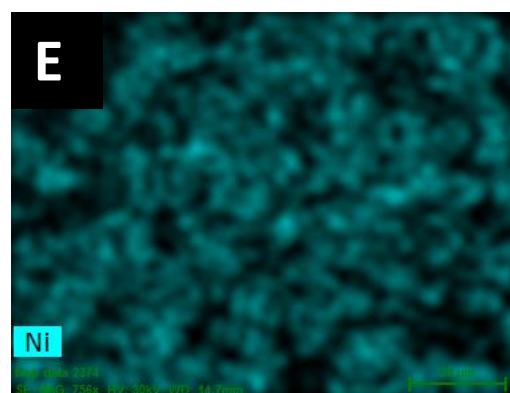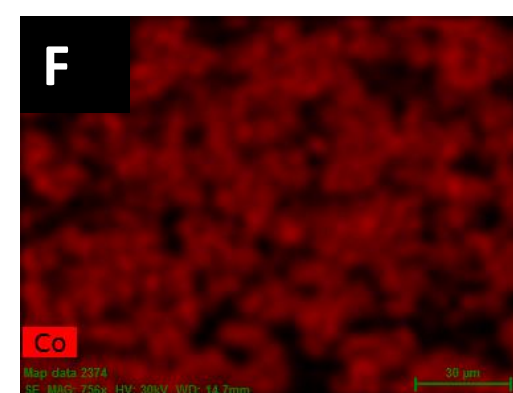

**Fig. S6.** EDAX and mapping of NiCo-MOF (1:3) indicating the presence of expected elements.

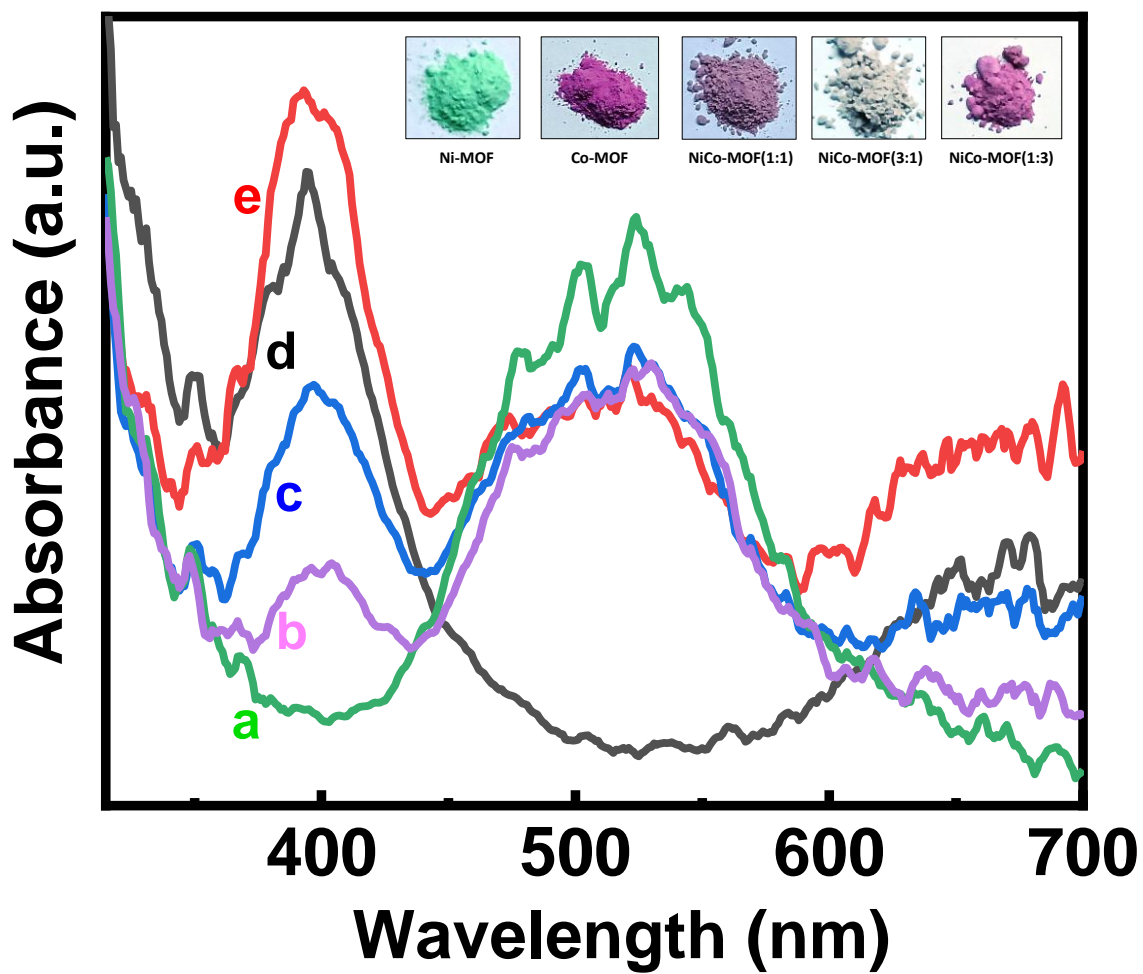

**Fig. S7.** UV-Visible absorption spectra of Co-MOF (a), NiCo-MOF (1:3) (b), NiCo-MOF (1:1) (c), Ni-MOF (d), and NiCo-MOF (3:1) (e). Inset shows the digital photos of different MOF samples.

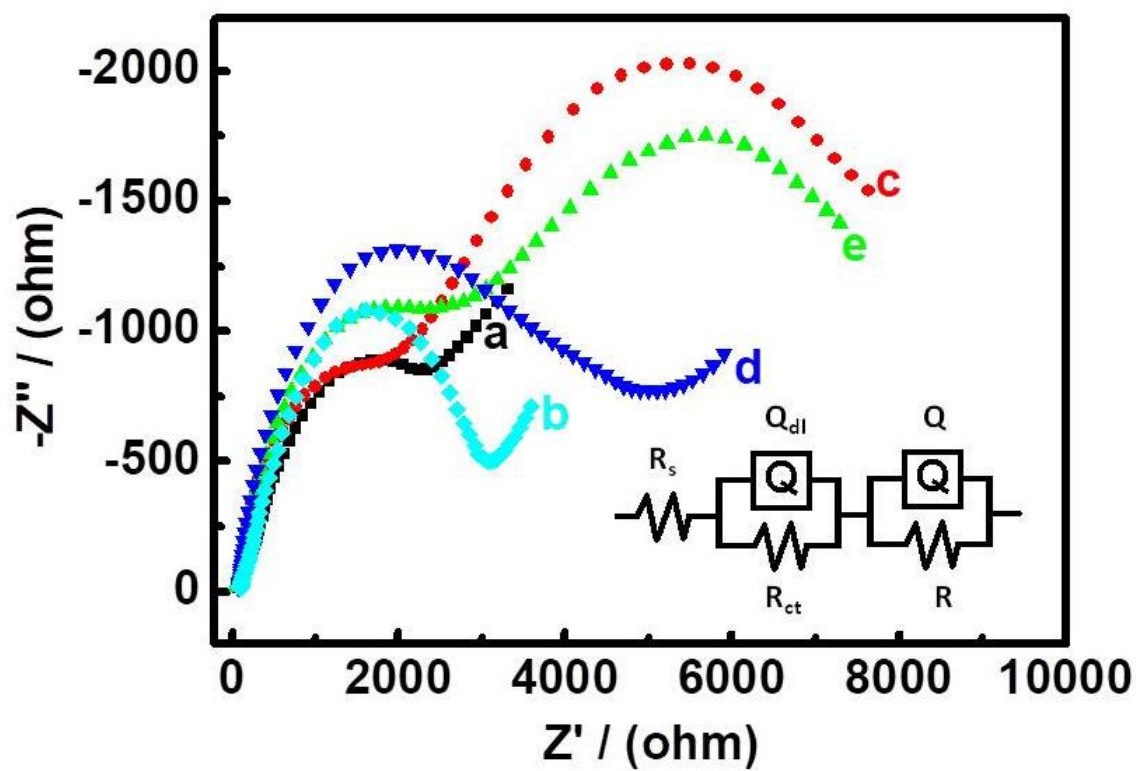

**Fig. S8.** Nyquist plot of Ni-MOF (a), Co-MOF (b), NiCo-MOF (1:1) (c), NiCo-MOF (1:3) (d), and NiCo-MOF (3:1) (e) coated GC. Inset shows the best-fit Randle's -equivalent circuit.

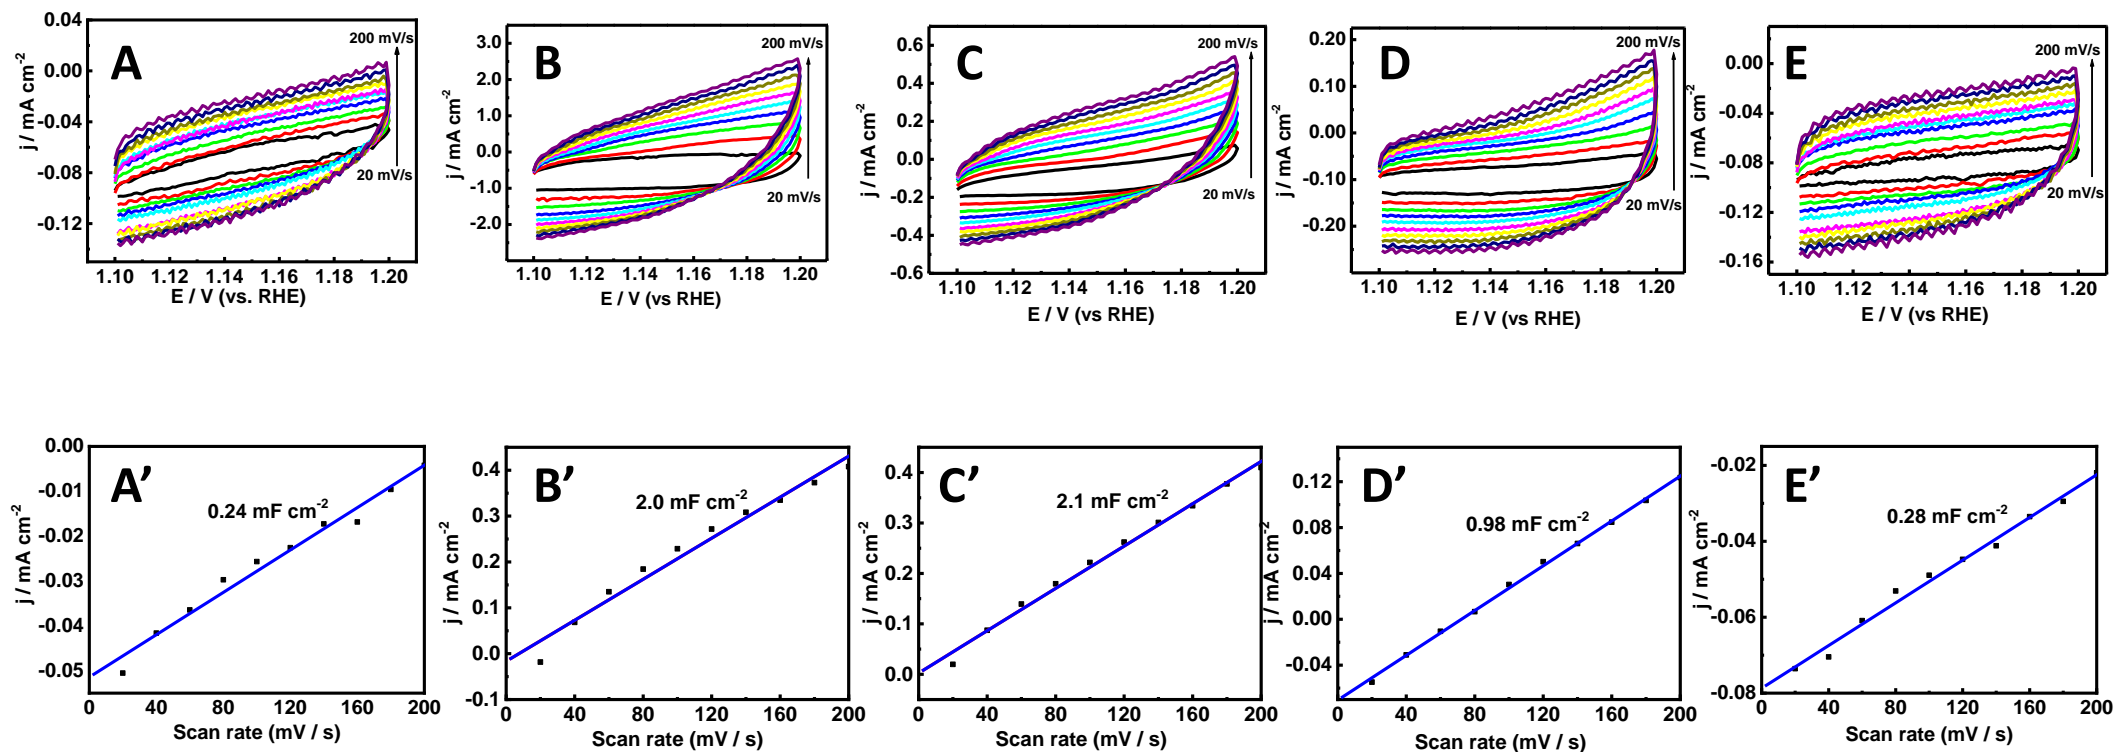

**Fig. S9.** CV responses of Ni-MOF (A), Co-MOF (B), NiCo-MOF (1:1) (C), NiCo-MOF (1:3) (D), and NiCo-MOF (3:1) (E) at different scan rates and their corresponding variation of current density with scan rate (A'-E').

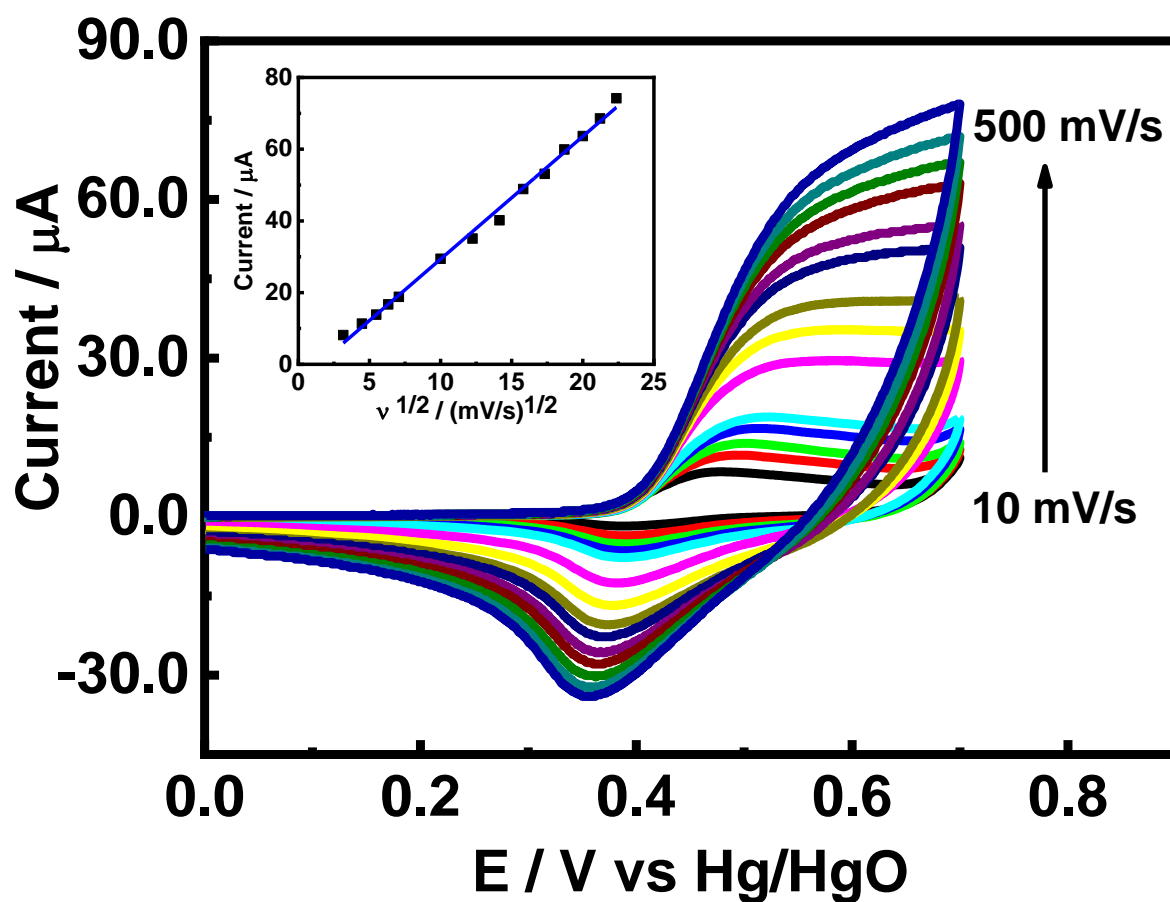

**Fig. S10.** CV curves of 1.0 mM HZ in 0.1 M KOH at different scan rates (10, 20, 30, 40, 50, 100, 150, 200, 250, 300, 350, 400, 450, and 500  $\text{mV s}^{-1}$ ). Inset shows the linear relationship between the current and square root of the scan rate.

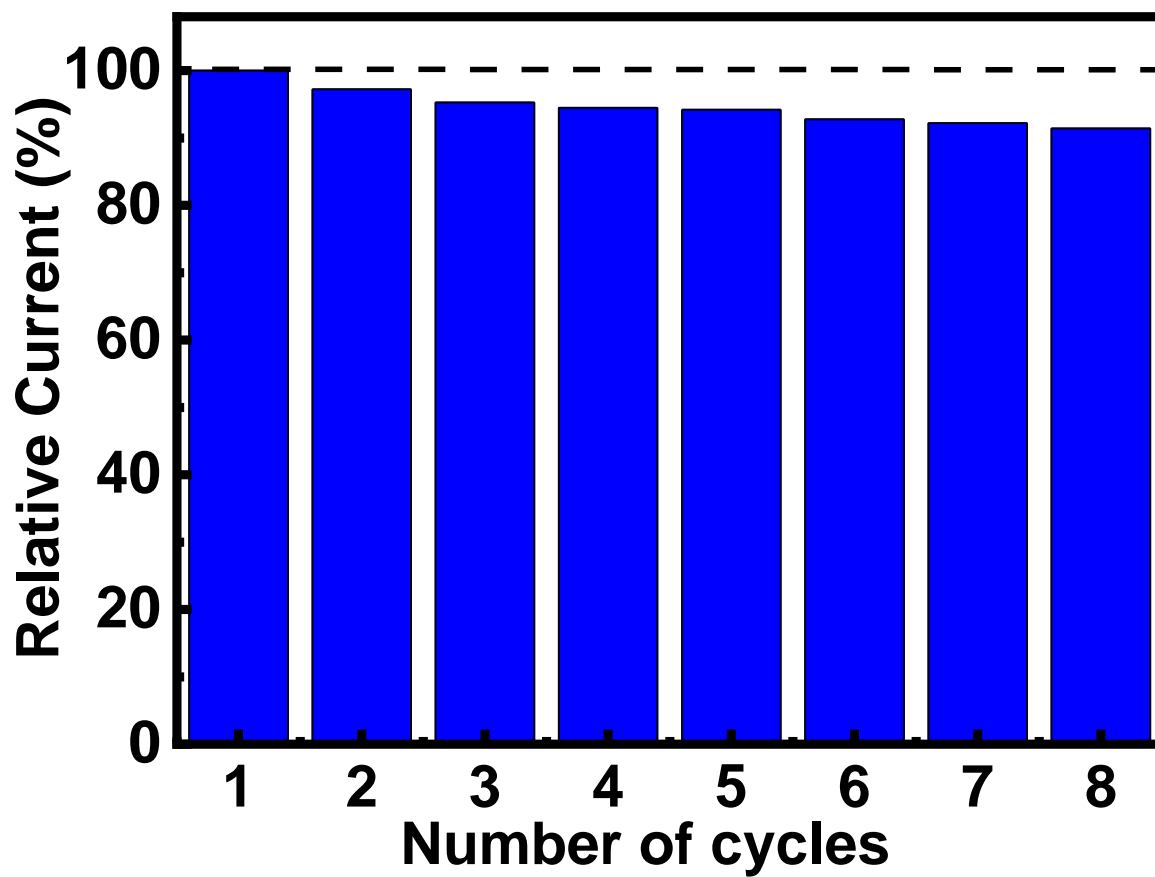

**Fig. S11.** Relative current values at GC/NiCo-MOF (1:1) for the oxidation of 1.0 mM of HZ in 0.1 M KOH

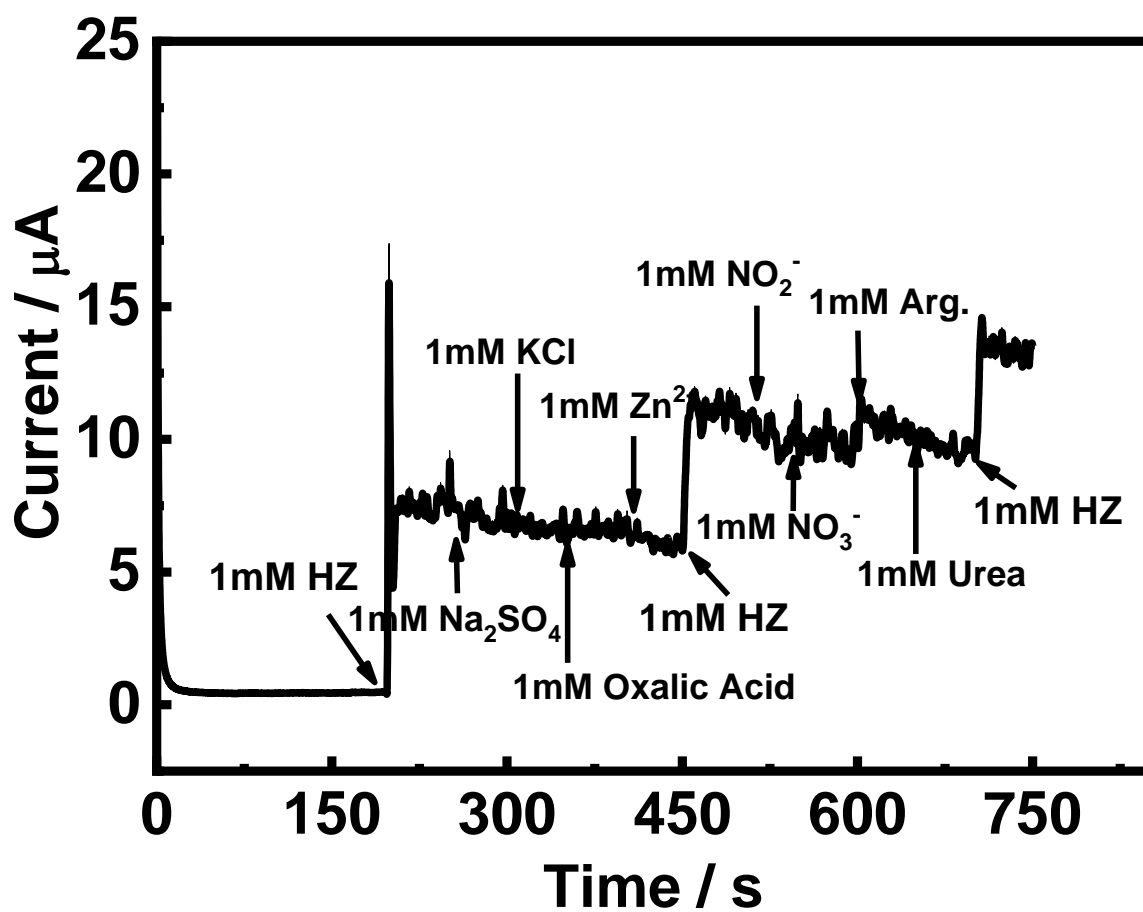

**Fig. S12.** Amperometric plot for interference study of HZ at GC/NiCo-MOF (1:1) in 0.1M KOH showing the selective oxidation of HZ in the presence of other potential interferences at an applied potential of 0.55V



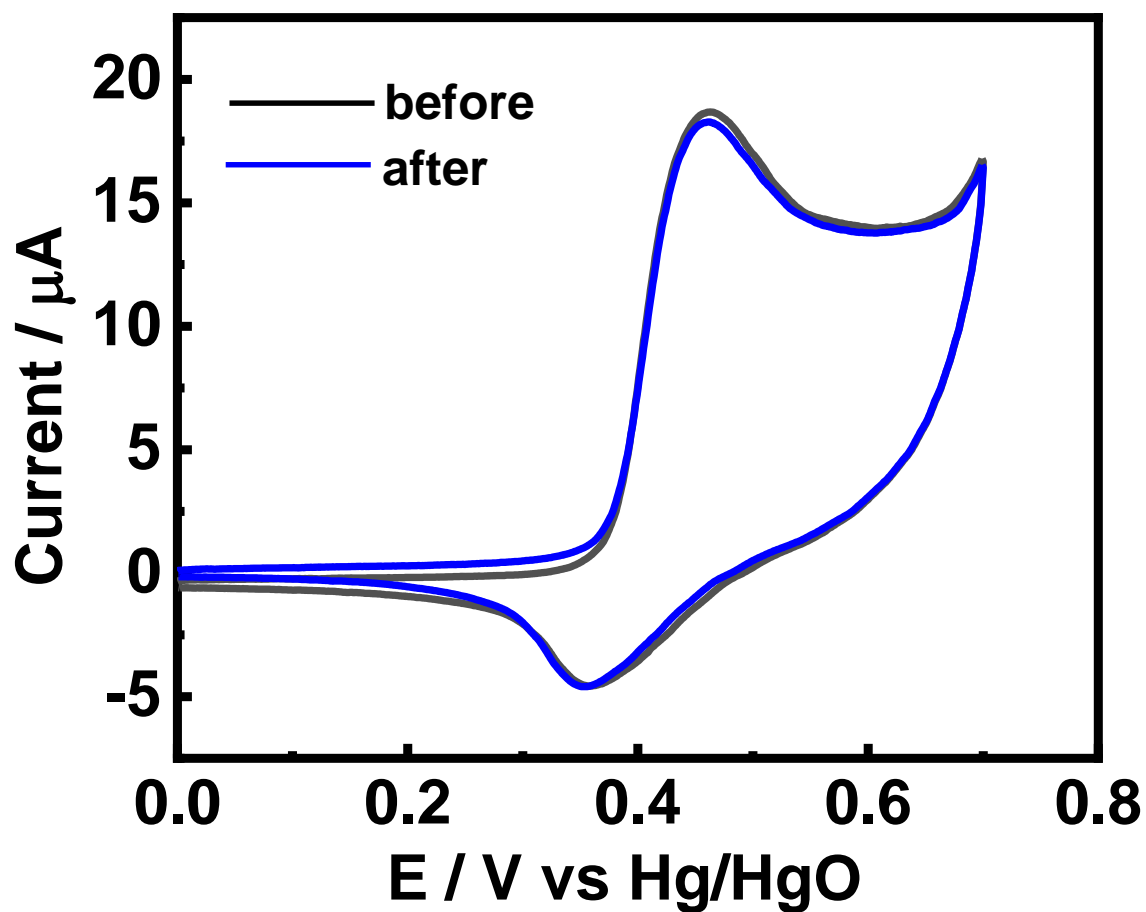

**Fig. S13.** CV response of GC/NiCo-MOF (1:1) before and after 50 continuous CV cycles in the presence of 1.0 mM HZ in 0.1 M KOH.

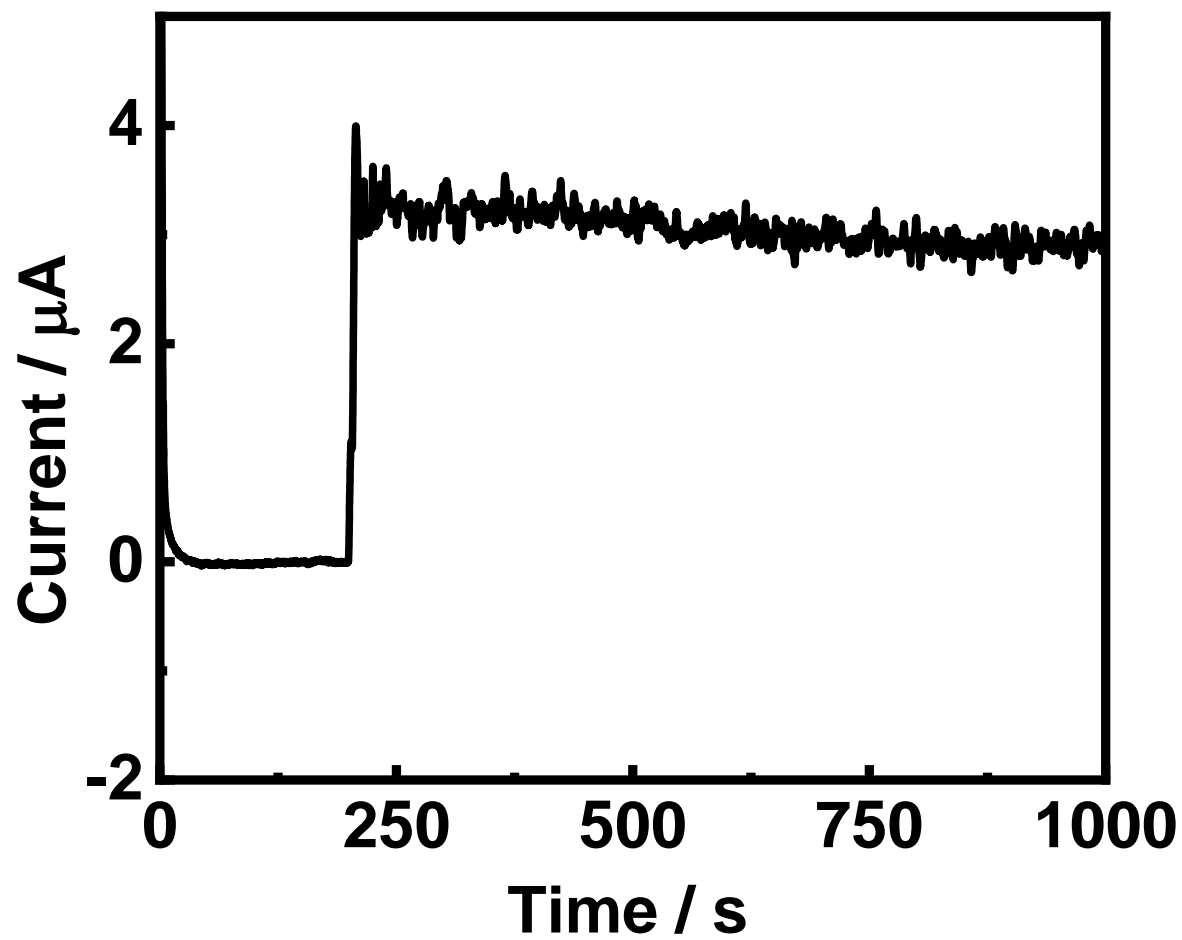

**Fig. S14.** The amperometric plot of GC/NiCo-MOF (1:1) after addition of 1.0 mM HZ at 200 s in 0.1 M KOH
